# Supplementary figures and images for: Intraoperative Hypertension Is Associated with Postoperative Acute Kidney Injury after Laparoscopic Surgery
Source: MDPI journal article supplement (doi:10.3390/jpm13030541), 2023-03-17

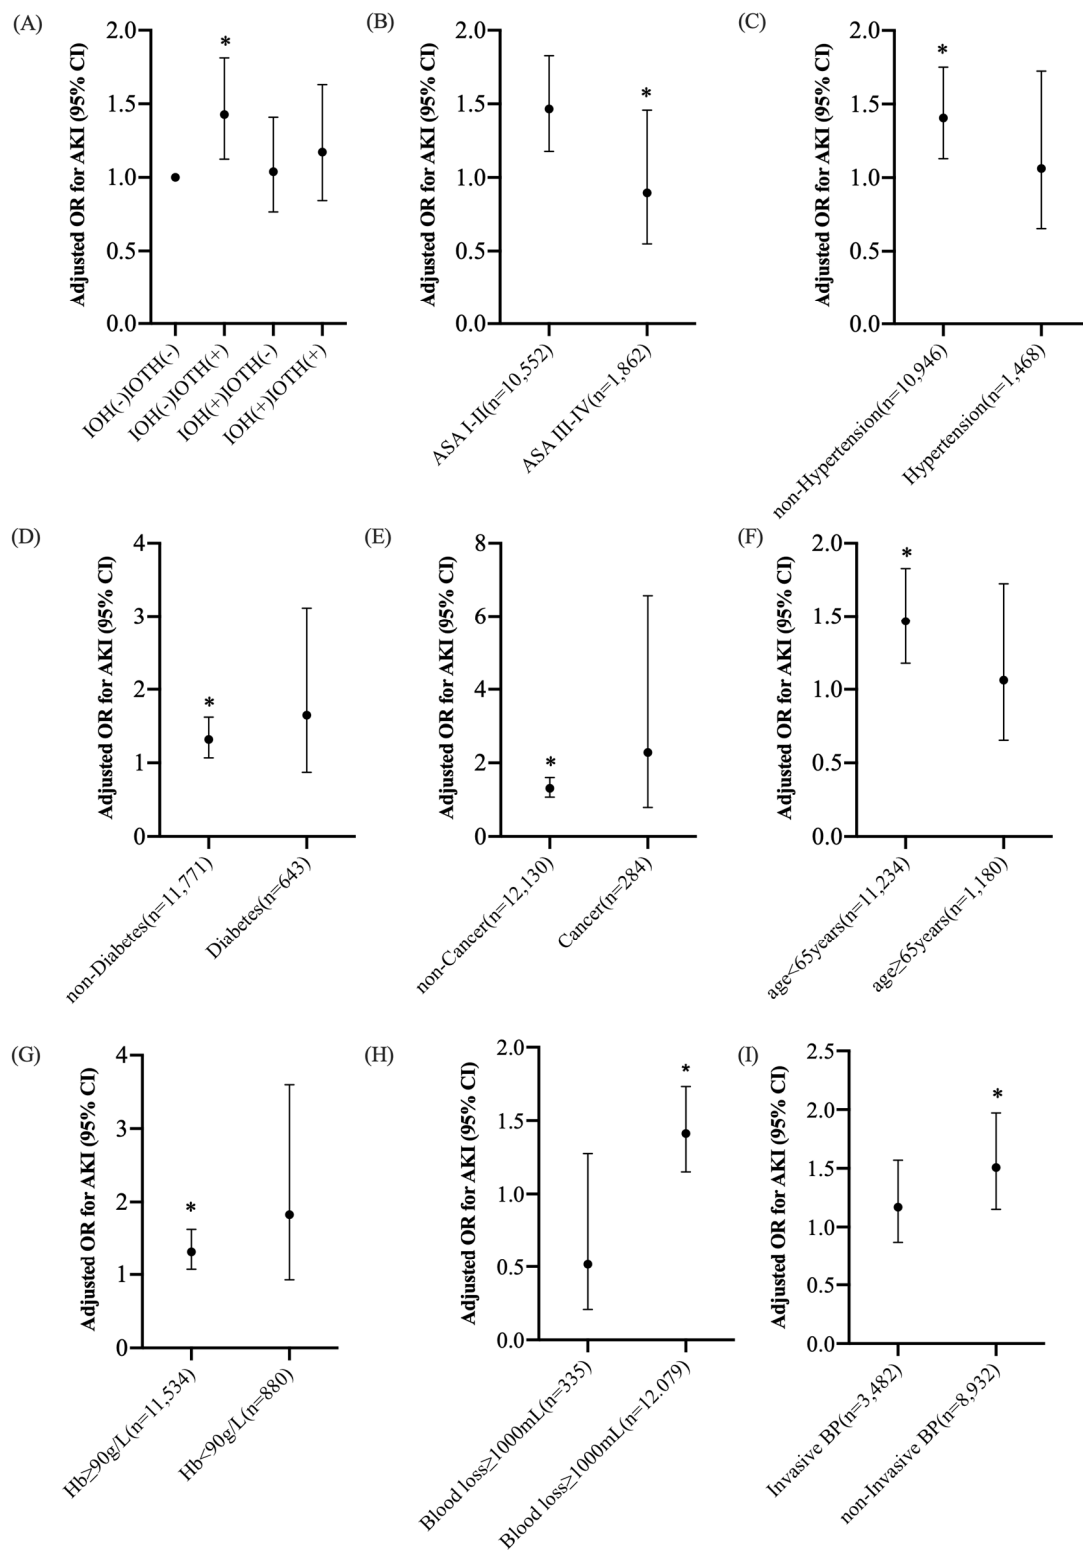

Supplement: s1 [file s1]
